# Supplementary material for: Examining the Contemporaneous, Short-Term, and Long-Term Effects of Secondary Exposure to Violence on Adolescent Substance Use
Source: Springer Nature journal article supplement (doi:10.1007/s10964-017-0694-4), 2017-05-22
Supplement: MOESM1 [file 12302770]

| **APPENDIX A.** Descriptive Statistics for Study Variables (*N* = 1,670 Persons, 79 Neighborhoods) | | | | |
| --- | --- | --- | --- | --- |
|  |  |  |  |  |
|  |  |  |  |  |
|  | % / Mean | n / SD | Min. | Max. |
|  |  |  |  |  |
|  |  |  |  |  |
| *Substance use* |  |  |  |  |
| Alcohol use |  |  |  |  |
| Wave 1 | 24.0% | 400 |  |  |
| Wave 2 | 32.7% | 546 |  |  |
| Wave 3 | 51.8% | 865 |  |  |
| Marijuana use |  |  |  |  |
| Wave 1 | 12.2% | 204 |  |  |
| Wave 2 | 15.9% | 266 |  |  |
| Wave 3 | 22.0% | 368 |  |  |
| Illicit drug use |  |  |  |  |
| Wave 1 | 2.7% | 45 |  |  |
| Wave 2 | 3.5% | 58 |  |  |
| Wave 3 | 4.6% | 77 |  |  |
|  |  |  |  |  |
| *Secondary exposure to violence variables* |  |  |  |  |
| Total secondary exposure to violence | 3.4 | 3.5 | 0 | 12 |
| 0: Zero times | 26.3% | 440 |  |  |
| 1: One time | 17.1% | 286 |  |  |
| 2: Two times | 8.3% | 139 |  |  |
| 3: Three times | 8.5% | 142 |  |  |
| 4: Four times | 5.6% | 94 |  |  |
| 5: Five times | 6.9% | 115 |  |  |
| 6: On average, between every other month and every six weeks | 5.1% | 86 |  |  |
| 7: On average, between every six weeks and once a month | 5.3% | 88 |  |  |
| 8: On average, between once a month and every three weeks | 4.2% | 70 |  |  |
| 9: On average, between every three weeks and every other week | 4.1% | 68 |  |  |
| 10: On average, between every other week and once a week | 4.3% | 71 |  |  |
| 11: On average, between once a week and once a day | 3.5% | 58 |  |  |
| 12: On average, at least once a day | 0.8% | 13 |  |  |
| No weapon present (witnessed someone get shoved, kicked, or punched) | 3.3 | 3.4 | 0 | 12 |
| 0: Zero times | 27.8% | 465 |  |  |
| 1: One time | 17.3% | 289 |  |  |
| 2: Two times | 8.6% | 144 |  |  |
| 3: Three times | 8.5% | 142 |  |  |
| 4: Four times | 5.6% | 94 |  |  |
| 5: Five times | 7.3% | 121 |  |  |
| 6: On average, between every other month and every six weeks | 3.9% | 65 |  |  |
| 7: On average, between every six weeks and once a month | 5.4% | 90 |  |  |
| 8: On average, between once a month and every three weeks | 3.3% | 55 |  |  |
| 9: On average, between every three weeks and every other week | 4.7% | 78 |  |  |
| 10: On average, between every other week and once a week | 4.0% | 67 |  |  |
| 11: On average, between once a week and once a day | 2.9% | 48 |  |  |
| 12: On average, at least once a day | 0.7% | 12 |  |  |
| Weapon present (witnessed someone get attacked with a knife, shot at, or shot) | 0.5 | 1.5 | 0 | 12 |
| 0: Zero times | 83.5% | 1,395 |  |  |
| 1: One time | 8.2% | 137 |  |  |
| 2: Two times | 2.8% | 47 |  |  |
| 3: Three times | 1.1% | 19 |  |  |
| 4: Four times | 0.7% | 11 |  |  |
| 5: Five times | 0.9% | 15 |  |  |
| 6: On average, between every other month and every six weeks | 0.7% | 12 |  |  |
| 7: On average, between every six weeks and once a month | 0.7% | 11 |  |  |
| 8: On average, between once a month and every three weeks | 0.3% | 5 |  |  |
| 9: On average, between every three weeks and every other week | 0.4% | 7 |  |  |
| 10: On average, between every other week and once a week | 0.3% | 5 |  |  |
| 11: On average, between once a week and once a day | 0.3% | 5 |  |  |
| 12: On average, at least once a day | 0.1% | 1 |  |  |
|  |  |  |  |  |
| *Demographic characteristics* |  |  |  |  |
| Male | 48.5% | 810 |  |  |
| Race/ethnicity |  |  |  |  |
| Hispanic | 45.9% | 766 |  |  |
| African American | 33.8% | 564 |  |  |
| Caucasian | 16.7% | 278 |  |  |
| Other | 3.6% | 60 |  |  |
| Age at wave 1 | 13.3 | 3.2 | 8.1 | 19.2 |
|  |  |  |  |  |
| *Individual differences* |  |  |  |  |
| Low self-control | 46.4 | 10.8 | 17 | 85 |
| Verbal reasoning | 97.8 | 18.7 | 44 | 156 |
| Peer substance use | 5.9 | 2.1 | 4 | 12 |
| Afraid of violence | 67.4% | 1,117 |  |  |
|  |  |  |  |  |
| *Family factors* |  |  |  |  |
| Family size | 5.3 | 2.0 | 2 | 14 |
| Parents’ marital status | 59.0% | 380 |  |  |
| Years living at current residence | 6.9 | 7.0 | 0.08 | 59 |
| Public assistance | 23.1% | 380 |  |  |
| Annual household income |  |  |  |  |
| 1: Less than $5,000 | 13.4% | 214 |  |  |
| 2: $5,000 – $9,999 | 8.6% | 138 |  |  |
| 3: $10,000 – $19,999 | 18.2% | 291 |  |  |
| 4: $20,000 – $29,999 | 19.1% | 306 |  |  |
| 5: $30,000 – $39,999 | 13.0% | 208 |  |  |
| 6: $40,000 – $49,999 | 10.3% | 164 |  |  |
| 7: At least $50,000 | 17.4% | 278 |  |  |
| Employed | 61.2% | 996 |  |  |
| Educational attainment |  |  |  |  |
| 1: Less than high school | 15.0% | 246 |  |  |
| 2: Some high school | 26.5% | 434 |  |  |
| 3: Finished high school | 14.6% | 240 |  |  |
| 4: Some more than high school | 33.4% | 548 |  |  |
| 5: Bachelor’s degree or more | 10.5% | 173 |  |  |
| Parental control | 5.8 | 1.7 | 0 | 9 |
| Family conflict | 2.8 | 2.0 | 0 | 9 |
| Family alcohol problems | 31.4% | 520 |  |  |
| Family drug problems | 21.4% | 354 |  |  |
|  |  |  |  |  |
| *Neighborhood characteristics* |  |  |  |  |
| Concentrated disadvantage | 0 | 1 | –1.65 | 2.22 |
| Residential stability | 0 | 1 | –1.71 | 2.03 |
| Ethnic heterogeneity | 0 | 1 | –3.10 | 1.86 |
| Collective efficacy | 0 | 1 | –1.92 | 2.51 |
| Disorder | 0 | 1 | –1.86 | 1.74 |
|  |  |  |  |  |
|  |  |  |  |  |
| *Notes*: Means and standard deviations are presented for interval and continuous variables. Percentage and number of respondents are presented for categorical variables. | | | | |
| *Abbreviations*: SD = standard deviation; Min. = minimum; Max. = maximum. | | | | |
